# Supplementary material for: Carboxyl-directed hydrothermal synthesis of WO3nanostructures and their morphology-dependent gas-sensing properties
Source: Royal Society of Chemistry journal article supplement (doi:10.1039/c4ce01167h), 2014-09-01
Supplement: c4ce01167h1.pdf [file c4ce01167h1.pdf]

Electronic Supplementary Information for

**Carboxyl-directed hydrothermal synthesis of WO<sub>3</sub>  
nanostructures and their morphology-dependent gas-sensing  
properties†**

**Shouli Bai, Kewei Zhang, Song Chen, Ruixian Luo,\* Dianqing Li and Aifan Chen**

\*Corresponding author:  
Tel.: + 86 010 64961040  
E-mail: luorx@mail.buct.edu.cn

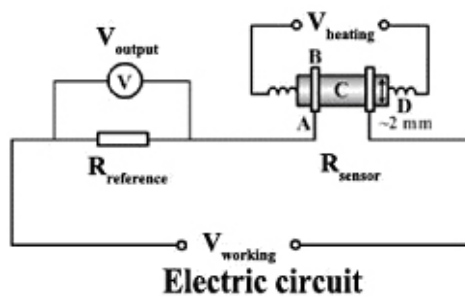

**Fig. S1** Schematic diagram of the test circuit for the gas-sensing measurement.

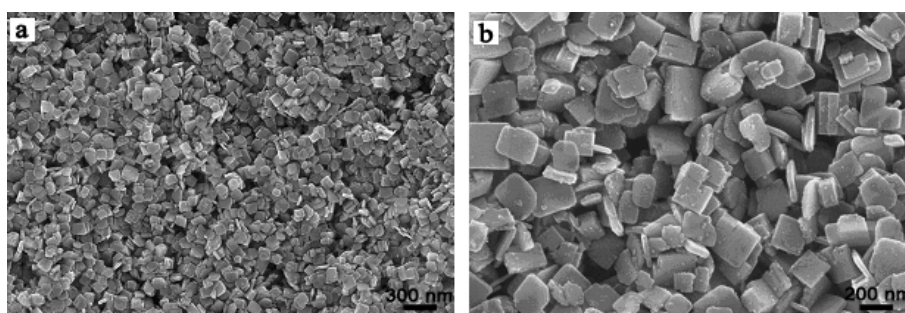

**Fig. S2** FESEM images of the  $\text{WO}_3$  samples obtained by adding 0.3 g (a) and 0.9 g (b) of citric acid

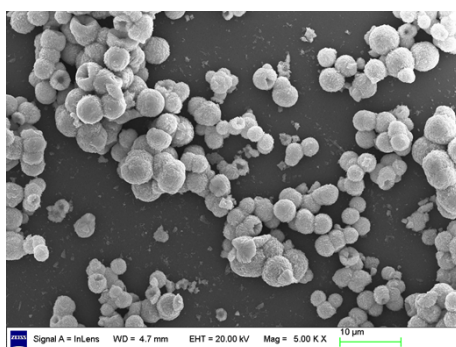

**Fig. S3** FESEM images of the  $\text{WO}_3$  hierarchical spheres with low magnification.

**Table S1** Physical properties of the  $\text{WO}_3$  with different morphologies after annealing at 600°C.

| Sample                  | BET surface area<br>( $\text{m}^2/\text{g}$ ) | Pore volume<br>( $\text{cm}^3/\text{g}$ ) | Average pore diameter<br>(nm) |
|-------------------------|-----------------------------------------------|-------------------------------------------|-------------------------------|
| 0D nanoparticles        | 58.01                                         | 0.18                                      | 11.16                         |
| 2D nanosheets           | 17.06                                         | 0.13                                      | 27.99                         |
| 3D hierarchical spheres | 8.58                                          | 0.07                                      | 32.93                         |
